# Supplementary material for: RK-33 Radiosensitizes Prostate Cancer Cells by Blocking the RNA Helicase DDX3
Source: Oxford University Press journal article supplement (doi:10.1158/0008-5472.can-16-0440), 2016-09-12
Supplement: 00085472can160440-sup-162255_2_supp_3615700_jbhjkk.docx [file 00085472can160440-sup-162255_2_supp_3615700_jbhjkk.docx]

**Supplementary Table 1**. Clinical characteristics of patients with low and high DDX3 expression.

|  |  | Cytoplasmic DDX3 | |  | Nuclear DDX3 | |  |
| --- | --- | --- | --- | --- | --- | --- | --- |
|  | Average | Low (0-2) | High (3) | p-value | Absent | Present | p-value |
| *N* |  | 37 | 13 |  | 29 | 21 |  |
| Mean age (range) | | 62.6 (50-70) | 59.4 (47-67) | 0.129a | 62.4 (47-70) | 60.9 (50-68) | 0.409a |
| Median PSA (range) | | 9.0 (1.7-41.4) | 7.3 (3.5-23.6) | 0.234a | 8.6 (2.2-29.4) | 10.9 (1.7-41.4) | 0.283a |
|  |  |  |  |  |  |  |  |
| Gleason score | |  |  |  |  |  |  |
|  | 5 | 11% (4) | 8% (1) | 0.507c | 7% (2) | 15% (3) | 0.295c |
|  | 6 | 46% (16) | 31% (4) |  | 46% (13) | 35% (7) |  |
|  | 7 | 26% (9) | 54% (7) |  | 39% (11) | 25% (5) |  |
|  | 8 | 11% (4) | 8% (1) |  | 4% (1) | 20% (4) |  |
|  | 9 | 6% (2) | 0% (0) |  | 4% (1) | 5% (1) |  |
|  |  |  |  |  |  |  |  |
| Gleason score | |  |  |  |  |  |  |
|  | < 7 | 57% (20) | 38% (5) | 0.250b | 54% (15) | 50% (10) | 0.807b |
|  | >= 7 | 43% (15) | 62% (8) |  | 46% (13) | 50% (10) |  |
|  |  |  |  |  |  |  |  |
| T (pathology) | |  |  |  |  |  |  |
|  | II | 69% (25) | 77% (10) | 0.731c | 79% (22) | 62% (13) | 0.201b |
|  | III + IV | 31% (11) | 23% (3) |  | 21% (6) | 38% (8) |  |
|  |  |  |  |  |  |  |  |
| Lymph nodes | |  |  |  |  |  |  |
|  | Nx | 35% (13) | 23% (3) | 0.221c | 35% (10) | 29% (6) | 0.719c |
|  | N0 | 62% (23) | 62% (8) |  | 62% (18) | 62% (13) |  |
|  | N1 | 3% (1) | 15% (2) |  | 3% (1) | 10% (2) |  |
|  |  |  |  |  |  |  |  |
| Risk group | |  |  |  |  |  |  |
|  | low | 3% (1) | 0% (0) | 0.778c | 4% (1) | 0% (0) | 0.959c |
|  | intermediate | 26% (9) | 15% (2) |  | 22% (6) | 24% (5) |  |
|  | high | 46% (16) | 62% (8) |  | 52% (14) | 47% (10) |  |
|  | locally advanced | 26% (9) | 23% (3) |  | 22% (6) | 29% (6) |  |
|  |  |  |  |  |  |  |  |
| Perineural growth | |  |  |  |  |  |  |
|  | no | 19% (5) | 20% (2) | 1.000c | 25% (5) | 13% (2) | 0.426c |
|  | yes | 81% (21) | 80% (8) |  | 75% (15) | 87% (14) |  |
|  |  |  |  |  |  |  |  |
| Resection margins | |  |  |  |  |  |  |
|  | negative | 39% (14) | 54% (7) | 0.350b | 50% (14) | 33% (7) | 0.243b |
|  | positive | 61% (22) | 46% (6) |  | 50% (14) | 67% (14) |  |

a = t-test; b = chi-square test; c = Fisher’s exact test
