# Supplementary material for: RK-33 Radiosensitizes Prostate Cancer Cells by Blocking the RNA Helicase DDX3
Source: Oxford University Press journal article supplement (doi:10.1158/0008-5472.can-16-0440), 2016-09-12
Supplement: 00085472can160440-sup-162255_2_supp_3615701_jbhjkk.docx [file 00085472can160440-sup-162255_2_supp_3615701_jbhjkk.docx]

**Supplementary Table 2**. Correlation between DDX3 expression and other immunohistochemical markers in prostate cancer patient’s samples. Abbreviations: n = nuclear, HIF = Hypoxia Inducible Factor, VEGF = Vascular endothelial growth factor, VHL = Von Hippel-Lindau protein, PHD = prolyl-hydroxylase; CA9 = Carbonic Anhydrase IX, GLUT = Glucose transporter

|  | Cytoplasmic DDX3 | | Nuclear DDX3 | |
| --- | --- | --- | --- | --- |
|  | Spearman’s rho | p-value | Spearman’s rho | p-value |
| nDDX3 | -0.135 | 0.350 | -0.135 | 0.350 |
| Ki67 | 0.225 | 0.124 | -0.219 | 0.135 |
| p21 | 0.304 | 0.038 | -0.239 | 0.106 |
| Androgen receptor | 0.384 | 0.006 | -0.415 | 0.003 |
| HIF1a | 0.126 | 0.392 | -0.100 | 0.498 |
| HIF2 | 0.113 | 0.451 | 0.071 | 0.636 |
| VEGF | -0.102 | 0.489 | 0.080 | 0.589 |
| cVHL | 0.147 | 0.319 | -0.380 | 0.008 |
| nVHL | -0.276 | 0.058 | 0.253 | 0.082 |
| cPHD1 | 0.173 | 0.230 | -0.011 | 0.937 |
| nPHD1 | -0.208 | 0.148 | 0.206 | 0.151 |
| cPHD2 | 0.294 | 0.042 | 0.005 | 0.974 |
| nPHD2 | -0.243 | 0.093 | 0.407 | 0.004 |
| cPHD3 | 0.431 | 0.002 | -0.154 | 0.290 |
| nPHD3 | -0.057 | 0.698 | 0.074 | 0.615 |
| cCA9 | 0.619 | 0.000 | -0.256 | 0.073 |
| GLUT1 | 0.142 | 0.343 | -0.005 | 0.973 |
